# Supplementary material for: Personalized bacteriophage therapy to treat pandrug-resistant spinal P. aeruginosa infection
Source: Research Square preprint supplement (doi:10.21203/rs.3.rs-1231457/v1), 2022-02-08
Supplement: Supplementary file 1 [file 2afe181041d0d9e1be4f6f37.docx]

**Table 1.** Phagogram (Efficiency of Plating [EOP]) of the non-purified phages on the patient strain.


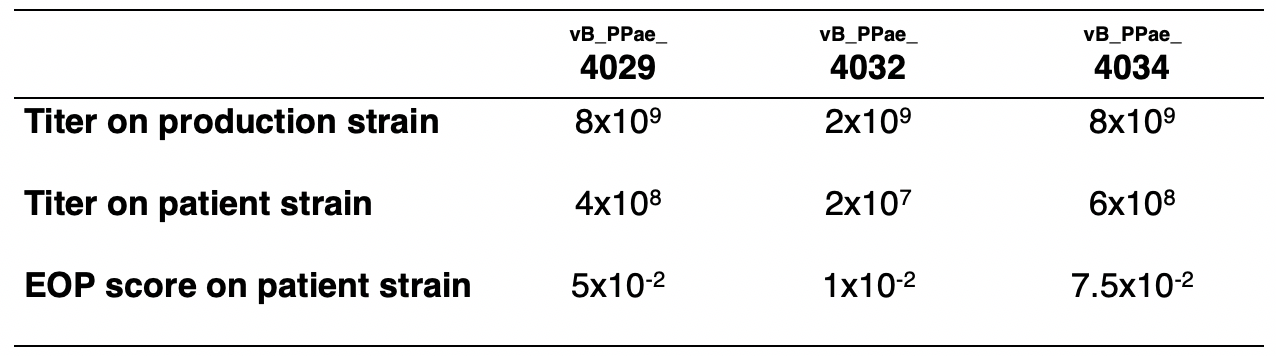


**Table 2.** Determination of EOP scores of the three phages on the patient’s strains isolated before phage therapy or during the second-stage surgery procedure (2 morphotypes, including one SCV morphotype).


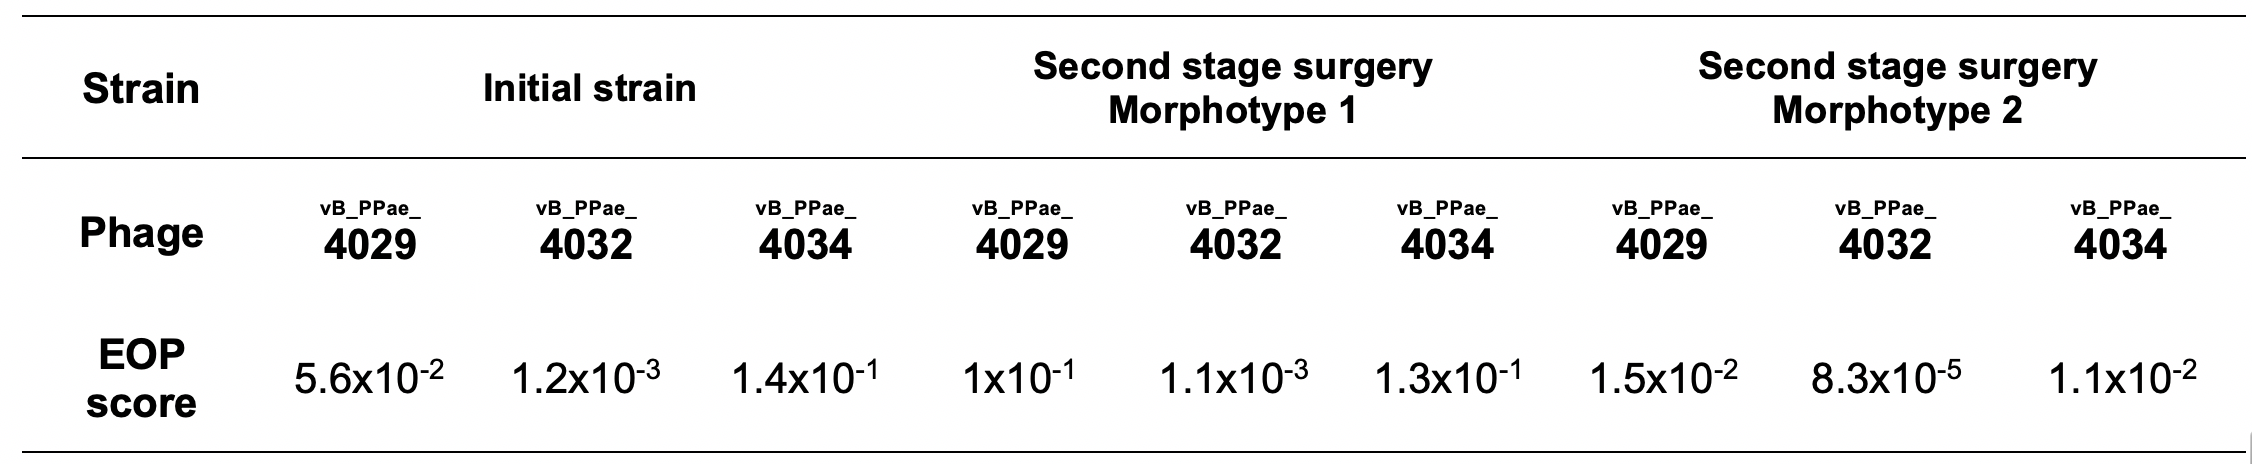


**
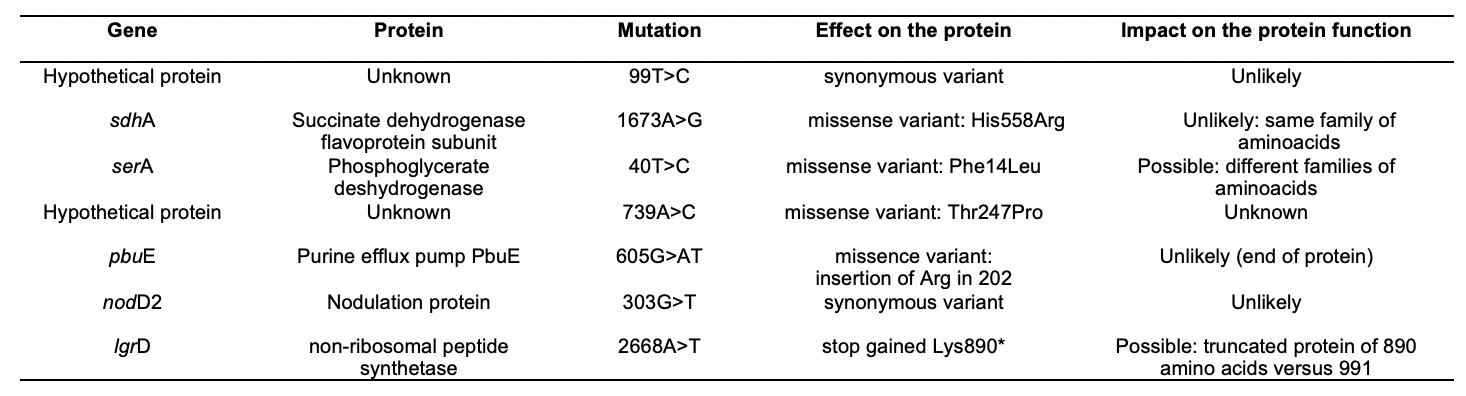
Table 3.** List of chromosomal mutations identified in the genome of the SCV morphotype (n°2) when compared to the genome of morphotype n°1. Variant calling was performed using the Snippy software (https://github.com/tseemann/snippy) after annotation of the reference genome of morphotype n°1 (Prokka software).
